# Supplementary material
Source: Springer Nature journal article supplement (https://www.springermedizin.de/resource/supplementary/12911_2013_883_MOESM4_ESM.pdf/9526640)
Supplement: MOESM4 [file 9526640]

|            |                                                                                   |                                                                                     |
|------------|-----------------------------------------------------------------------------------|-------------------------------------------------------------------------------------|
|            | Concepts sharing the same CUI = C0040149                                          |                                                                                     |
|            | Thyroiditis, subacute<br>(MeSH, “automatic”)                                      | E06.1 - Subacute<br>thyroiditis (ICD10)                                             |
| VCM icon   |  |  |
| Primitives | Current condition<br>Disease<br>Endocrine system                                  | Current condition<br>Disease<br>Inflammation<br>Thyroid                             |
